# Supplementary material
Source: Research Square preprint supplement (doi:10.21203/rs.3.rs-9656090/v1)
Supplement: Supplementary file 1 [file 7c719eda09861a083529b3a6.docx]

**APPENDIX A: AI RISK ATTRIBUTION SURVEY ITEMS**

**Survey 1: AI-Related Music Industry Displacement**

**Preamble**

You are invited to take part in a study about how people in the music industry think about artificial intelligence (AI).

The survey will take about 5–10 minutes to complete. Your participation is voluntary and anonymous: no identifying information will be collected. By continuing, you confirm that you are 18 years of age or older and agree to participate in this research.

**Role [write-in]**

What is your **primary** job or role within the music industry? *For example, are you a sound technician, vocalist, song writer, DJ, producer, pianist, etc.?*

**Displacement Risk**

People have different opinions about how artificial intelligence (AI) might affect jobs. This survey asks for **your perspective** as a member of the music industry. For the following questions, **1=Not At All Likely** and **10=Completely Likely**

How likely is it that AI will replace workers **across the economy**?

How likely is it that AI will replace workers **within the music industry**?

Recall that when we asked you **your primary role** in the music industry, you said [**populate with response to role write-in item**] within the music industry?

How likely is it that **you personally** will lose your music industry role because of AI?

**Open Prompt**

Take a moment to reflect. Please explain your answers to the previous questions about AI and worker displacement. **Why did you answer as you did?**

**Demographics**

The following questions ask about your background and demographics.

These will help us understand how perspectives may differ across those who take the survey

What is your racial identity? Select all that apply

White or Caucasian

Black or African American

American Indian/Native American or Alaska Native

Asian

Native Hawaiian or Other Pacific Islander

Other

Prefer not to say

Are you of Spanish, Hispanic, or Latino origin?

Yes

No

Prefer not to say

Select your gender

Woman

Man

Non-binary

Prefer to self-define __________________________________________________

Prefer not to say

Select your age [Dropdown]

[18-100]

**Survey 2: AI-Related Academic Deskilling**

**Preamble**

You are invited to take part in a study about the potential impact of artificial intelligence (AI) on learning and academic skills.

The survey will take about 5–10 minutes to complete. Your participation is voluntary and anonymous: no identifying information will be collected. By continuing, you confirm that you are 18 years of age or older and agree to participate in this research.

**Deskilling Risk**

People have different opinions about how artificial intelligence (AI) might affect students' academic skills like critical thinking, problem solving, and effective writing. This survey asks for **your perspective** as a student. For the following questions, **1= Do Not Agree** and **10= Strongly Agree**

Loss of academic skills related to AI is a real problem affecting **my peers** *right now*.

Loss of academic skills related to AI is a real problem that will affect **my peers** *over the long term*.

Loss of academic skills related to AI is a real problem affecting **me personally** *right now*.

Loss of academic skills related to AI is a real problem that will affect **me personally** *over the long term*.

Open Prompt

Review your level of agreement below [**Populate with responses to deskilling items—peers now, peers long term, me now, me long term**]

Please explain your answers to the above prompts about AI and academic skills. Why did you answer as you did? Use as much detail as you are comfortable with.

**Demographics**

The following questions ask about your background and demographics. These will help us understand how perspectives may differ across those who take the survey.

What is your racial identity? Select all that apply

White or Caucasian

Black or African American

American Indian/Native American or Alaska Native

Asian

Native Hawaiian or Other Pacific Islander

Other

Prefer not to say

Are you of Spanish, Hispanic, or Latino origin?

Yes

No

Prefer not to say

Select your gender

Woman

Man

Non-binary

Prefer to self-define __________________________________________________

Prefer not to say

In which academic year are you currently enrolled?

1st

2nd

3rd

4th

5th

6th or above

What school are you in? Select all that apply.

[Removed to protect respondent anonymity. Schools are specific to the university where this study was conducted]

**APPENDIX B: RESULTS TABLES**

**Table A3.** T-Test for Displacement Risk Attributions: Role versus Economy

| *Scope Level* | N | Mean | SD | t | p-value |
| --- | --- | --- | --- | --- | --- |
| *Role* | 115 | 4.330435 | 2.873722 | -10.1309 | P<.001 |
| *Economy* | 115 | 6.913043 | 2.404547 |

*Two-tailed test*

**Table A4.** T-Test for Displacement Risk Attributions: Role versus Industry

| *Scope Level* | N | Mean | SD | t | p-value |
| --- | --- | --- | --- | --- | --- |
| *Role* | 115 | 4.330435 | 2.873722 | -8.1968 | P<.001 |
| *Industry* | 115 | 6.069565 | 2.529551 |

*Two-tailed test*

**Table A5.** T-Test for Displacement Risk Attributions: Personal versus Economy

| *Scope Level* | N | Mean | SD | t | p-value |
| --- | --- | --- | --- | --- | --- |
| *Personal* | 115 | 3.582609 | 2.622382 | -13.1772 | P<.001 |
| *Economy* | 115 | 6.913043 | 2.404547 |

*Two-tailed test*

**Table A6.** T-Test for Displacement Risk Attributions: Personal versus Industry

| *Scope Level* | N | Mean | SD | t | p-value |
| --- | --- | --- | --- | --- | --- |
| *Personal* | 115 | 3.582609 | 2.622382 | -10.9950 | P<.001 |
| *Industry* | 115 | 6.069565 | 2.529551 |

*Two-tailed test*

| **Table A7.** Repeated-Measures ANOVA Results for Displacement Risk Attributions  (N = 460 observations; 115 Respondents by 4 Scope Levels) | | | | | |
| --- | --- | --- | --- | --- | --- |
| Source | Sum of Squares | df | Mean Squares | F | p-value |
| Between Subjects | 2129.687 | 114 | 18.681465 | 6.49 | P<.001 |
| Within Subjects | 811.95435 | 3 | 270.65145 | 94.04 |
| Total | 3925.937 | 459 |  |  |
| *Repeated‑measures factor is the level of scope (Economy, Industry, Role, Personal). Sphericity tests indicated Huynh‑Feldt ε =*0.8743*; Greenhouse‑Geisser ε =*0.8530*; Box ε =*0.3333 | | | | | |

| **Table A8.** Repeated-Measures ANOVA Bonferroni Pairwise Comparisons for Displacement RiskAttributions | | | | |
| --- | --- | --- | --- | --- |
| Comparison | Difference | Standard Error | Bonferroni t | p-value |
| Industry vs. Economy | -.8434783 | .2237257 | -3.77 | P=.001 |
| Role vs. Economy | -2.582609 | .2237257 | -11.54 | P<.001 |
| Personal vs. Economy | -3.330435 | .2237257 | -14.89 | P<.001 |
| Role vs. Industry | -1.73913 | .2237257 | -7.77 | P<.001 |
| Personal vs. Industry | -2.486957 | .2237257 | -11.12 | P<.001 |
| Personal vs. Role | -.7478261 | .2237257 | -3.34 | P=.006 |

**Table A9.** T-Test for Displacement Risk Attributions: Personal versus Role

| *Scope Level* | N | Mean | SD | t | p-value |
| --- | --- | --- | --- | --- | --- |
| *Personal* | 115 | 3.582609 | 2.622382 | -4.1997 | P<.001 |
| *Role* | 115 | 4.330435 | 2.873722 |

*Two-tailed test*

**Table A10.** T-Test for Deskilling Risk Attributions: Me Now versus Peers Now

| *Scope Level* | N | Mean | SD | t | p-value |
| --- | --- | --- | --- | --- | --- |
| *Me Now* | 145 | 4.841379 | 2.155986 | -10.3992 | P<.001 |
| *Peers Now* | 145 | 6.834483 | 1.787354 |

*Two-tailed test*

**Table A11.** T-Test for Deskilling Risk Attributions: Me Over the Long Term versus Peers

Over the Long Term

| *Scope Level* | N | Mean | SD | t | p-value |
| --- | --- | --- | --- | --- | --- |
| *Me Long Term* | 145 | 5.510345 | 2.264206 | -10.0954 | P<.001 |
| *Peers Long Term* | 145 | 7.551724 | 1.82548 |

*Two-tailed test*

| **Table A12.** Repeated-Measures ANOVA Results for Deskilling Risk Attributions  (N= 580; 145 Respondents by 4 Scope Levels) | | | | |
| --- | --- | --- | --- | --- |
| Sum of Squares | df | Mean Squares | F | P-value |
| 1327.5103 | 144 | 9.2188218 | 3.90 | P<.001 |
| 659.78448 | 3 | 219.92816 | 93.15 |
| 3007.2603 | 579 |  |  |
| *Repeated‑measures factor is the level of scope (Me Now, Me Over the Long Term, Peers Now, Peers Over the Long Term). Sphericity tests indicated Huynh–Feldt ε =*0.6119*, Greenhouse–Geisser ε =0.*6047*, and Box’s conservative ε=*0.3333 | | | | |

| **Table A13.** Repeated-Measures ANOVA Bonferroni Pairwise Comparisons for Deskilling Risk Attributions | | | | |
| --- | --- | --- | --- | --- |
| Comparison | Difference | Standard Error | Bonferroni t | p-value |
| Me Now vs. Me Long Term | .6689655 | .1804604 | 3.71 | P=.001 |
| Peers Now vs. Me Now | 1.993103 | .1804604 | 11.04 | P<.001 |
| Peers Long Term vs. Me Now | 2.710345 | .1804604 | 15.02 | P<.001 |
| Peers Now vs. Me Long Term | 1.324138 | .1804604 | 7.34 | P<.001 |
| Peers Long Term vs. Me Long Term | 2.041379 | .1804604 | 11.31 | P<.001 |
| Peers Now vs. Peers Long Term | .7172414 | .1804604 | 3.97 | P<.001 |

**Table A14.** T-Test for Deskilling Risk Attributions: Me Now versus Me Over the Long Term

| *Scope Level* | N | Mean | SD | t | p-value |
| --- | --- | --- | --- | --- | --- |
| *Me Now* | 145 | 4.841379 | 2.155986 | -5.5799 | P<.001 |
| *Me Long Term* | 145 | 5.510345 | 2.264206 |

*Two-tailed test, OPP 2026*

**APPENDIX C: VARIATIONS FROM OSF PRE-REGISTRATION**

1. Our pre-registered target samples were larger than the ones we ultimately collected. Our initial target was 150 for each group. However, we had difficulty obtaining this number for the music industry sample without over-sampling from institutional training settings (e.g., music schools and performing arts conservatories). We therefore adjusted our target sample size to 100 usable surveys, which we exceeded for both samples (115—music industry displacement; 145—academic deskilling).
2. Hypotheses are presented slightly differently in OSF than the paper. This is for purposes of presentational clarity and precision. The hypotheses are substantively unchanged.
